# Supplementary material for: The Effect of Oxytocin on Third-Party Altruistic Decisions in Unfair Situations: An fMRI Study
Source: PubMed Central journal article supplement (PMC4735743; doi:10.1038/srep20236), 2016-02-02
Supplement: srep20236-s1.pdf [file srep20236-s1.pdf]

# The Effect of Oxytocin on Third-Party Altruistic Decisions in Unfair Situations: An fMRI Study

Yang Hu<sup>1,\*</sup>, Dirk Scheele<sup>2,3</sup>, Ben Becker<sup>2,3,4</sup>, Georg Voos<sup>1</sup>, Bastian David<sup>1</sup>, René Hurlemann<sup>2,3</sup>, Bernd Weber<sup>1,5</sup>

<sup>1</sup>Center for Economics and Neuroscience, University of Bonn, 53127, Germany

<sup>2</sup>Department of Psychiatry, University Hospital Bonn, 53127, Germany

<sup>3</sup>Department of Medical Psychology, University Hospital Bonn, 53127, Germany

<sup>4</sup>Key Laboratory for NeuroInformation, School of Life Science and Technology, Center for Information in Medicine, University of Electronic Science and Technology of China, 610054, P.R. China

<sup>5</sup>Department of Epileptology, University Hospital Bonn, 53127, Germany

\* [huyang@uni-bonn.de](mailto:huyang@uni-bonn.de)

## Supplementary Information

### Supplementary Table S1 Three-way interaction between drug treatment (OXT/PLC), agency (self-decision/computer-decision), and decision (help/punish) at the neural level (N = 22)

| Brain Region                                                                                                   | Hemisphere | Cluster Size | MNI Coordinates |     |    | BA    | T-value |
|----------------------------------------------------------------------------------------------------------------|------------|--------------|-----------------|-----|----|-------|---------|
|                                                                                                                |            |              | x               | y   | z  |       |         |
| <i>[PLC_(help-help_computer)-(punish-punish_computer)]-[OXT_(help-help_computer)-(punish-punish_computer)]</i> |            |              |                 |     |    |       |         |
| SFG/MFG                                                                                                        | R          | 234          | 32              | 16  | 54 | 6/8   | 4.07*   |
| IFG/MFG                                                                                                        | R          | 98           | 56              | 22  | 22 | 45/46 | 3.89    |
| TPJ/SMG/STG                                                                                                    | L          | 58           | -52             | -50 | 20 | 40    | 3.90    |
| IPL                                                                                                            | R          | 341          | 42              | -46 | 46 | 40    | 4.18*   |
| SMA/PaCL                                                                                                       | B          | 337          | -2              | -12 | 70 | 6     | 4.67*   |
| MTG                                                                                                            | L          | 59           | -44             | -44 | -8 | 37    | 3.85    |
| PCG/PoCG                                                                                                       | L          | 74           | -54             | -10 | 10 | 43    | 3.75    |
| PCG/PoCG                                                                                                       | R          | 141          | 52              | -14 | 30 | 3/4   | 4.00    |
| Thalamus                                                                                                       | L          | 91           | -18             | -22 | 14 |       | 4.52    |
| <i>[OXT_(help-help_computer)-(punish-punish_computer)]-[PLC_(help-help_computer)-(punish-punish_computer)]</i> |            |              |                 |     |    |       |         |
| -                                                                                                              |            |              |                 |     |    |       |         |

Note: Threshold is set to  $p < 0.001$ ,  $k=50$ , uncorrected; \* Significant at  $p < 0.05$  family wise error corrected at the cluster level; OXT=oxytocin, PLC=placebo; L=left, R=right, B=bilateral, BA=Brodman Area; IFG=Inferior Frontal Gyrus, IPL=Inferior Parietal Lobule, MFG=Middle Frontal Gyrus, MTG=Middle Temporal Gyrus, PCG=Precentral Gyrus, PoCG=Postcentral Gyrus, PaCL=Paracentral Lobule, SFG=Superior Frontal Gyrus, SMA=Supplementary Motor Area, SMG=Supramarginal Gyrus, TPJ=Temporo-parietal Junction; brain regions are labeled according to the automated anatomic labeling toolbox for SPM8.

**Supplementary Table S2 Two-way interaction between drug treatment (OXT/PLC) and decision (help/punish) on computer-decision trials at the neural level (N = 34)**

| Brain Region                                                                         | Hemisphere | Cluster Size | MNI Coordinates |     |    | BA       | T-value |
|--------------------------------------------------------------------------------------|------------|--------------|-----------------|-----|----|----------|---------|
|                                                                                      |            |              | x               | y   | z  |          |         |
| <i>[PLC_(help_computer- punish_computer)]-[OXT_(help_computer -punish_computer)]</i> |            |              |                 |     |    |          |         |
| -                                                                                    |            |              |                 |     |    |          |         |
| <i>[OXT_(help_computer- punish_computer)]-[PLC_(help_computer -punish_computer)]</i> |            |              |                 |     |    |          |         |
| PCG/IFG                                                                              | L          | 179          | -62             | 4   | 14 | 6/44     | 4.16    |
| PoCG/Insula/STG                                                                      | L          | 115          | -48             | -18 | 14 | 13/41/43 | 3.86    |
| TPJ                                                                                  | L          | 255          | -54             | -52 | 26 | 40       | 4.38*   |
| PaCL/SMA/PCG                                                                         | B          | 399          | 2               | -32 | 66 | 4/5/6    | 4.63*   |

Note: This additional analysis was conducted to test whether the modulatory effect of OXT<sup>IN</sup> on computer-decision trials is biased by the exclusion of 13 participants who showed only one or none of the altruistic decisions (help/punish) in either OXT/PLC or both sessions. This analysis was performed in the entire sample (N = 34; 22 subjects in the main sample plus 12 additional subjects in the excluded sample; the fMRI data from one of the 13 excluded subjects were not available due to technical errors). By using the same ROI as in our main analyses (i.e. a 5mm-sphere centered around the coordinates of -53/-59/20), this analysis confirmed stronger activation of left TPJ (peak MNI coordinates: -54/-54/22;  $t(99)=3.77$ ,  $p(\text{FWE})=0.002$ ) during computer-help decision trials in the OXT<sup>IN</sup> condition (i.e. the contrast [OXT\_(help\_computer-punish\_computer)-PLC\_(help\_computer-punish\_computer)]). Post-hoc T-test further confirmed that OXT<sup>IN</sup> selectively enhanced the activation in left TPJ during the help\_computer trials ( $t(33) = 2.938$ ,  $p = 0.006$ ) rather than punish\_computer trials ( $t(33) = -1.560$ ,  $p = 0.128$ ).

The whole-brain results are based on a threshold of  $p < 0.001$ ,  $k=50$ , uncorrected; \* Significant at  $p < 0.05$  family wise error corrected at the cluster level; L=left, R=right, B=bilateral, BA=Brodmann Area; IFG=Inferior Frontal Gyrus, PCG=Precentral Gyrus, PoCG=Postcentral Gyrus, PaCL=Paracentral Lobule, SMA=Supplementary Motor Area, SMG=Supramarginal Gyrus, STG=Superior Temporal Gyrus; TPJ=Temporo-parietal Junction; brain regions are labeled according to the automated anatomic labeling toolbox for SPM8.

**Supplementary Table S3 Two-way interaction between drug treatment (OXT/PLC) and decision (help/punish) on computer-decision trials at the neural level (N = 12)**

| Brain Region                                                                       | Hemisphere | Cluster Size | MNI Coordinates |     |     | BA      | T-value |
|------------------------------------------------------------------------------------|------------|--------------|-----------------|-----|-----|---------|---------|
|                                                                                    |            |              | x               | y   | z   |         |         |
| <i>[PLC_(help_computer-punish_computer)]-[OXT_(help_computer-punish_computer)]</i> |            |              |                 |     |     |         |         |
| -                                                                                  |            |              |                 |     |     |         |         |
| <i>[OXT_(help_computer-punish_computer)]-[PLC_(help_computer-punish_computer)]</i> |            |              |                 |     |     |         |         |
| IFG/Insula                                                                         | L          | 99           | -56             | 0   | 12  | 6/13/44 | 3.51    |
| TPJ                                                                                | L          | 372          | -62             | -48 | 32  | 40      | 3.71    |
| IPL/SPL                                                                            | R          | 56           | 48              | -54 | 58  | 40      | 3.72    |
| Insula/PoCG                                                                        | L          | 233          | -48             | -18 | 16  | 13      | 3.74    |
| Insula/PoCG                                                                        | R          | 207          | 42              | -16 | 22  | 13      | 3.92    |
| PCG                                                                                | L          | 145          | -22             | -12 | 60  | 6       | 3.42    |
| PCG                                                                                | R          | 185          | 32              | -12 | 44  | 4/6     | 4.19    |
| PoCG/PaCL/PCG                                                                      | R          | 1009         | 48              | -24 | 54  | 3/4/6   | 4.00*   |
| TP/STG/PHG                                                                         | L          | 332          | -28             | 6   | -24 | 28/38   | 3.95    |
| STG                                                                                | R          | 110          | 58              | -16 | 8   | 22/41   | 3.35    |
| MTG/ITG                                                                            | R          | 83           | 64              | -42 | -10 | 21      | 3.40    |
| FG                                                                                 | R          | 81           | 44              | -34 | -20 | 37      | 3.76    |
| SMA/MCG                                                                            | L          | 63           | -10             | -2  | 48  | 24      | 3.50    |
| MCG/PaCL                                                                           | L          | 137          | -16             | -24 | 42  | 24/31   | 3.41    |
| PaCL                                                                               | R          | 67           | -16             | -34 | 66  | 4/6     | 3.25    |

Note: This additional analysis was conducted to test whether the modulatory effect of OXT<sup>IN</sup> on computer-decision trials is biased by the exclusion of 13 participants. This analysis was performed in the excluded sample (n = 12; see Supplementary Table S2). In the same ROI-based analysis, we also observed higher activation in left TPJ in the same contrast (see Supplementary Table S2; peak MNI coordinates: -48/-56/22; t(33) = 2.61, p(FWE)=0.05). Results of post-hoc T-test were also replicated in the 12 initially excluded subjects (help\_computer trials: t(11) = 2.383, p = 0.036; punish\_computer trials: t(11) = -1.236, p = 0.242). Together with the results in Supplementary Table S2, these findings were consistent with our results in the main analyses that OXT<sup>IN</sup> selectively increased the activation of left TPJ during the observation of victims being helped by the computer, in the entire sample as well as in the sub-group of initially excluded subjects. To sum up, this suggests comparable effects of OXT<sup>IN</sup> in the sub-groups and argues against specific effects in the sub-group selected by behavioral response in the main analyses.

The whole-brain results are based on a more lenient threshold given the smaller sample size (i.e. p < 0.005, k=50, uncorrected); \*Significant at p < 0.05 family wise error corrected at the cluster level; OXT=oxytocin, PLC=placebo; L=left, R=right, B=bilateral, BA=Brodmann Area; FG=Fusiform Gyrus, IFG=Inferior Frontal Gyrus, IPL=Inferior Parietal Lobule, ITG=Inferior Temporal Gyrus, MCG=Mid-Cingulate Gyrus, MTG=Middle Temporal Gyrus, MOG=Middle Occipital Gyrus, PoCG=Postcentral Gyrus, PaCL=Paracentral Lobule, PHG=Parahippocampal Gyrus, SMA=Supplementary Motor Area, SPL=Superior Parietal Lobule, STG=Middle Temporal Gyrus, TP=Temporal Pole, TPJ=Temporo-parietal Junction; brain regions are labeled according to the automated anatomic labeling toolbox for SPM8.

**Supplementary Table S4 Main effects of agency (self-decision/computer-decision) at the neural level (N = 22)**

| Brain Region                                                  | Hemisphere | Cluster Size | MNI Coordinates |     |     | BA                                | T-value |
|---------------------------------------------------------------|------------|--------------|-----------------|-----|-----|-----------------------------------|---------|
|                                                               |            |              | x               | y   | z   |                                   |         |
| <b><i>Self-decision - Computer-decision</i></b>               |            |              |                 |     |     |                                   |         |
| MFG/IFG                                                       | L          | 146          | -38             | 48  | 8   | 10/46                             | 4.05    |
| MFG                                                           | L          | 410          | -38             | 32  | 26  | 9/46                              | 6.31*   |
| IFG                                                           | R          | 216          | 60              | 10  | 24  | 9/45                              | 4.50    |
| Insula                                                        | R          | 240          | 34              | 20  | 8   | 13                                | 5.61*   |
| SMA/ACC/IPL/SPL/<br>Precuneus/PCG/PoCG/<br>Insula/<br>SFG/MFG | B          | 13095        | -6              | 10  | 50  | 2/3/4/<br>6/7/8/9/13/<br>24/32/40 | 10.86*  |
| MOG/IOG                                                       | L          | 377          | -28             | -90 | -4  | 18/19                             | 7.39*   |
| MOG/IOG/MTG                                                   | R          | 556          | 32              | -90 | -4  | 18/19                             | 7.08*   |
| Thalamus/Brainstem                                            | B          | 1052         | -4              | -26 | -2  |                                   | 6.01*   |
| <b><i>Computer-decision - Self-decision</i></b>               |            |              |                 |     |     |                                   |         |
| SFG                                                           | B          | 361          | 4               | 46  | 48  | 8/9                               | 4.74*   |
| MPFC/SFG                                                      | B          | 588          | -12             | 58  | 22  | 9/10                              | 4.27*   |
| IFG/MFG                                                       | R          | 678          | 50              | 42  | 2   | 45/46                             | 6.33*   |
| SFG/MFG                                                       | R          | 389          | 24              | 26  | 46  | 8                                 | 5.52*   |
| TPJ/IPL/SMG/AG/<br>MTG/STG                                    | L          | 1027         | -48             | -70 | 26  | 39/40                             | 6.36*   |
| TPJ/IPL/SMG/AG/<br>MTG/STG                                    | R          | 4051         | 56              | -52 | 18  | 21/22/<br>39/40                   | 7.97*   |
| Precuneus/PCC/MCC                                             | B          | 1036         | -12             | -52 | 32  | 7/31                              | 4.90*   |
| MTG/STG                                                       | L          | 1173         | -56             | -16 | -8  | 21/22                             | 5.63*   |
| PoCG                                                          | L          | 122          | -24             | -40 | 60  | 3                                 | 3.88    |
| Precuneus/PoCG                                                | R          | 526          | 12              | -50 | 62  | 3/5/7                             | 4.81*   |
| PHG/FG                                                        | L          | 319          | -26             | -50 | -6  | 19                                | 5.31*   |
| PHG/FG                                                        | R          | 474          | 24              | -44 | -10 | 19                                | 5.83*   |
| Cuneus/LG/SOG/MOG                                             | B          | 3692         | -8              | -94 | 12  | 7/17/<br>18/19/31                 | 8.92*   |
| Hippocampus/<br>PHG/Amygdala                                  | L          | 110          | -24             | -4  | -14 |                                   | 4.20    |
| Hippocampus/<br>PHG/Amygdala                                  | R          | 124          | 20              | -4  | -14 |                                   | 4.69    |

Note: Threshold is set to  $p < 0.001$ ,  $k=50$ , uncorrected; \* Significant at  $p < 0.05$  family wise error corrected at the cluster level; L=left, R=right, B=bilateral, BA=Brodman Area; ACC=Anterior Cingulate Cortex, FG=Fusiform Gyrus, IFG=Inferior Frontal Gyrus, IPL=Inferior Parietal Lobule, IOG=Inferior Occipital Gyrus, LG=Ligual Gyrus, MCC=Mid-Cingulate Cortex, MFG=Middle Frontal Gyrus, MOG=Middle Occipital Gyrus, MPFC=Medial Prefrontal Cortex, MTG=Middle Temporal Gyrus, PCG=Precentral Gyrus, PoCG=Postcentral Gyrus, PHG= Parahippocampa Gyrus, SFG=Superior Frontal Gyrus, SMA=Supplementary Motor Area, SMG=Supramarginal Gyrus, SOG=Superior Occipital Gyrus, SPL=Superior Parietal Lobule, STG=Superior Temporal Gyrus; TPJ=Temporo-parietal Junction; brain regions are labeled according to the automated anatomic labeling toolbox for SPM8.

**Supplementary Table S5 Two-way interaction between drug treatment (OXT/PLC) and decision (help/punish) on self-decision trials at the neural level (N = 22)**

| Brain Region                                           | Hemisphere | Cluster Size | MNI Coordinates |     |    | BA    | T-value |
|--------------------------------------------------------|------------|--------------|-----------------|-----|----|-------|---------|
|                                                        |            |              | x               | y   | z  |       |         |
| <b><i>[PLC_(help- punish)]-[OXT_(help-punish)]</i></b> |            |              |                 |     |    |       |         |
| SMA/PaCL                                               | B          | 128          | -2              | -12 | 70 | 6     | 4.44    |
| Insula                                                 | R          | 102          | 46              | 2   | 4  | 13    | 4.27    |
| Insula/PoCG                                            | R          | 85           | 46              | -18 | 18 | 13    | 3.67    |
| STG/TPJ/MTG                                            | L          | 153          | -46             | -50 | 10 | 39/41 | 4.51    |
| PCG/STG                                                | L          | 67           | -54             | -12 | 12 | 43    | 4.19    |
| Precuneus/LG                                           | R          | 85           | 16              | -44 | 4  | 27    | 3.94    |
| MOG                                                    | R          | 63           | 36              | -70 | -2 | 19/37 | 4.17    |
| Thalamus                                               | R          | 55           | 8               | -18 | 2  |       | 3.92    |
| <b><i>[OXT_(help- punish)]-[PLC_(help-punish)]</i></b> |            |              |                 |     |    |       |         |
| -                                                      |            |              |                 |     |    |       |         |

Note: Threshold is set to  $p < 0.001$ ,  $k=50$ , uncorrected; \*Significant at  $p < 0.05$  family wise error corrected at the cluster level;

OXT=oxytocin, PLC=placebo; L=left, R=right, B=bilateral, BA=Brodman Area; LG=Lingual Gyrus, MTG=Middle Temporal Gyrus, MOG=Middle Occipital Gyrus, PCG=Precentral Gyrus, PoCG=Postcentral Gyrus, PaCL=Paracentral Lobule, SMA=Supplementary Motor Area, STG=Superior Temporal Gyrus, TPJ=Temporo-parietal Junction; brain regions are labeled according to the automated anatomic labeling toolbox for SPM8.

**Supplementary Table S6 Modulatory influence of empathic concern on the oxytocin effect on neural correlates of third-party prosocial decisions**

| Brain Region                                                                 | Hemisphere | Cluster Size | MNI Coordinates |     |    | BA   | T-value |
|------------------------------------------------------------------------------|------------|--------------|-----------------|-----|----|------|---------|
|                                                                              |            |              | x               | y   | z  |      |         |
| <b><i>[PLC_(help-punish) - OXT_(help-punish)] &amp; Empathic Concern</i></b> |            |              |                 |     |    |      |         |
| IPL                                                                          | L          | 122          | -54             | -40 | 46 | 40   | 4.72    |
| IPL                                                                          | R          | 276          | 44              | -48 | 50 | 7/40 | 5.77*   |
| PCG/PoCG                                                                     | L          | 92           | -34             | -26 | 52 | 3/4  | 4.37    |
| <b><i>[OXT_(help-punish) - PLC_(help-punish)] &amp; Empathic Concern</i></b> |            |              |                 |     |    |      |         |
| -                                                                            |            |              |                 |     |    |      |         |

Note: Threshold is set to  $p < 0.001$ ,  $k=50$ , uncorrected; \* Significant at  $p < 0.05$  family wise error corrected at the cluster level;

OXT=Oxytocin, PLC=Placebo; L=left, R=right, B=bilateral, BA=Brodman Area; IPL=Inferior Parietal Lobule, PCG=Precentral Gyrus,

PoCG=Postcentral Gyrus; brain regions are labeled according to the automated anatomic labeling toolbox for SPM8.

**a**

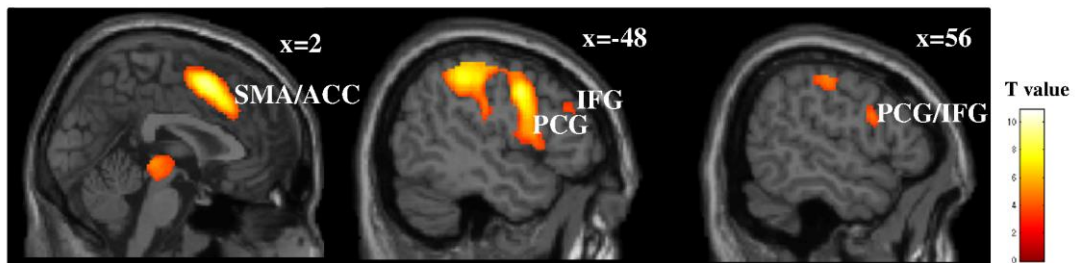

**b**

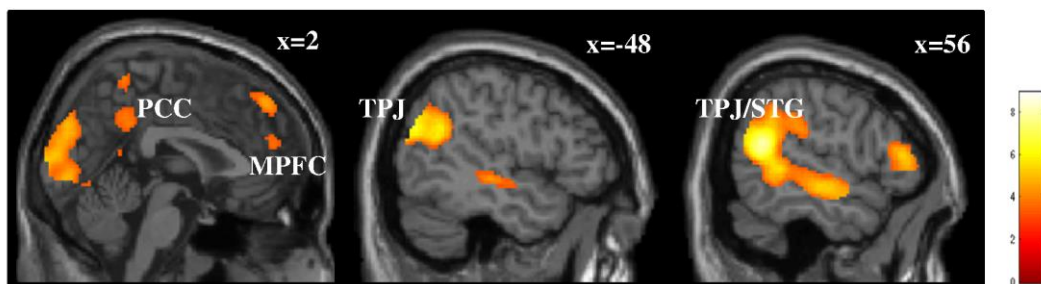

**Supplementary Figure S1 Regions showing a main effect of agency** (a) Regions showing enhanced responses in self-decision (vs. computer-decision) conditions; (b) Regions showing enhanced responses in computer-decision (vs. self-decision) conditions. ACC = Anterior Cingulate Cortex, IFG = Inferior Frontal Gyrus, IPL=Inferior Parietal Lobule, MPFC=Medial Prefrontal Cortex, PCC = Posterior Cingulate Cortex, PCG = Precentral Gyrus, SMA=Supplementary Motor Area, STG = Superior Temporal Gyrus; TPJ=Temporo-parietal Junction; the threshold was set at  $p < 0.001$ ,  $k = 50$ .
